# Supplementary material for: Differential Kat3 Usage Orchestrates the Integration of Cellular Metabolism with Differentiation
Source: MDPI journal article supplement (doi:10.3390/cancers13235884), 2021-11-23
Supplement: s1 [file s1]

# Supplementary Materials: Differential Kat3 Usage Orchestrates the Integration of Cellular Metabolism with Differentiation

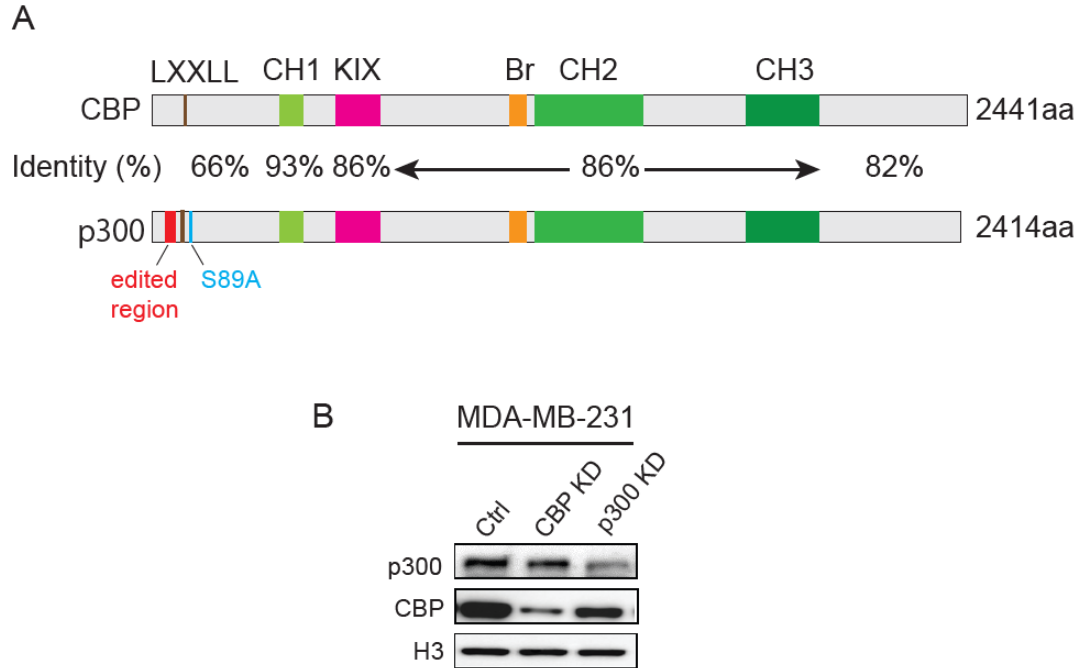

**Figure S1.** Disrupted P300 function favors glycolytic cell metabolism. **(A)** Schematic view of CBP and p300 protein domains showing their identity. LXXLL motif, binding site of nuclear receptor; CH, Cysteine/histidine; KIX, Kinase-inducible domain interacting domain; Br, Bromodomain; edited region indicating the region deleted in p300 protein in P19 cells. **(B)** CBP and p300 knockdown efficiency determined by western blot. The uncropped western blot figures were presented in Figure S4.

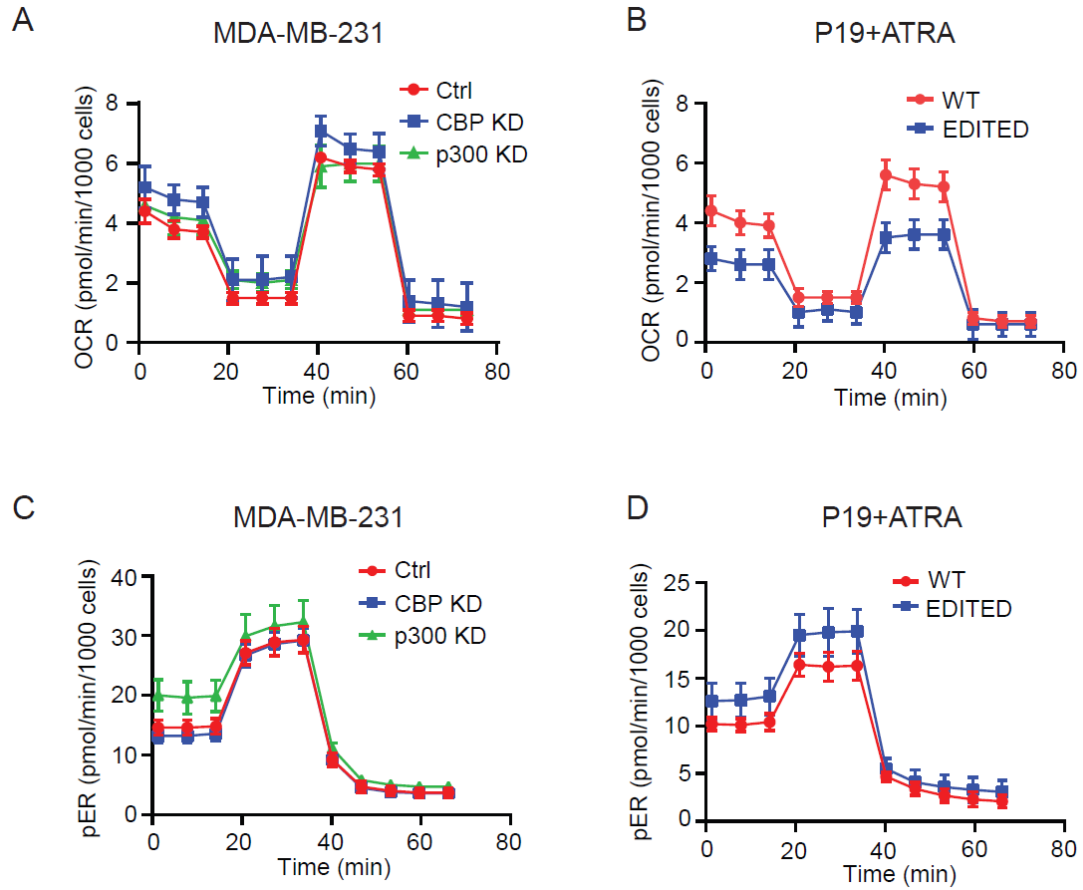

**Figure S2.** Dichotomous role of CBP and p300 in cellular metabolism and energetics. **(A)** Oxygen consumption rate (OCR) curves of MDA-MB-231 control (Ctrl), CBP KD and p300 KD cells by mitochondrial stress test. **(B)** OCR curves of P19 WT and P19 EDITED cells treated with ATRA by mitochondrial stress test. **(C)** Proton efflux rate (PER) of MDA-MB-231 control (Ctrl), CBP KD and p300 KD cells by glycolytic rate assay. **(D)** PER of P19 WT and EDITED cells treated with ATRA by glycolytic rate assay.

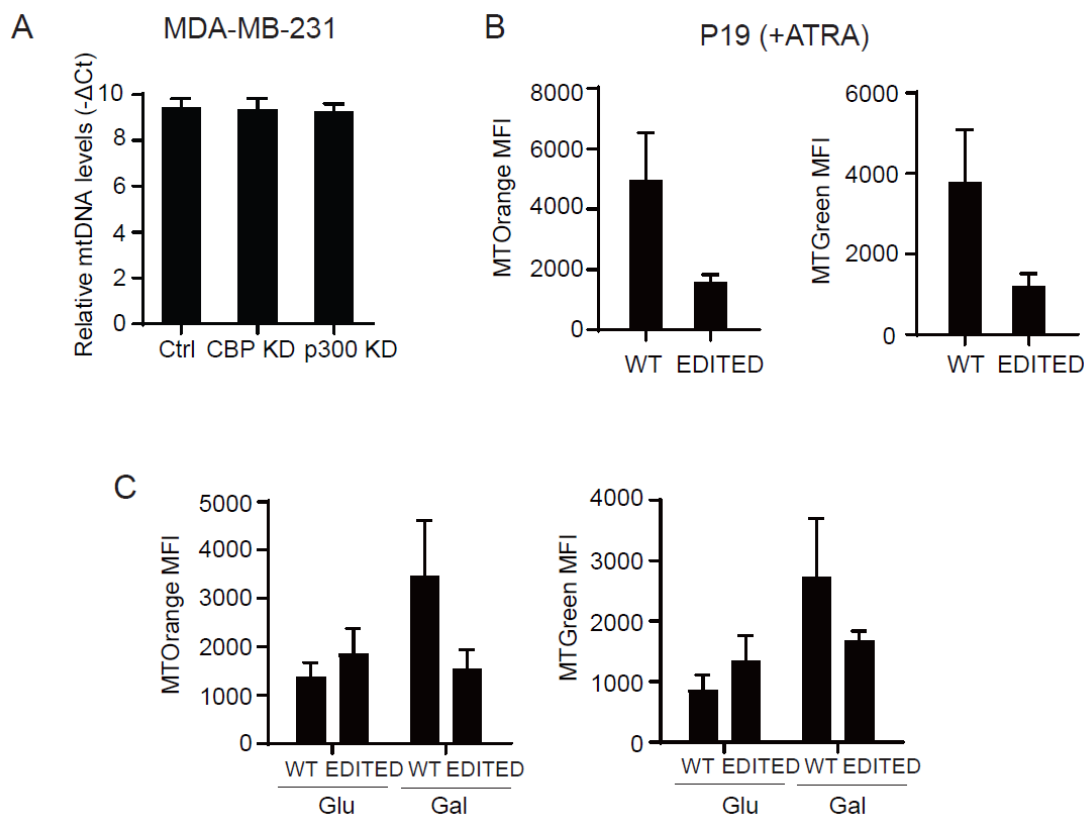

**Figure S3.** Differential roles of CBP and p300 in mitochondrial biogenesis and activity. **(A)** Relative mtDNA levels tested by qPCR in MDA-MB-231 control (Ctrl), CBP KD and p300 KD cells. **(B)** Bar graphs show the MFI for MitoTracker Orange staining (left panel) and MitoTracker Green staining (right panel) in P19 WT and EDITED cells treated with ATRA in Figure 4D. **(C)** Bar graphs show the MFI for MitoTracker Orange staining (left panel) and MitoTracker Green staining (right panel) in P19 WT and EDITED cells cultured in glucose (Glu) or galactose (Gal) medium in Figure 4E. MFI: Median Fluorescence Intensity.

Table S1 qPCR primer sequences

| Gene symbol | Forward (5'-3')            | Reverse (5'-3')             | Species |
|-------------|----------------------------|-----------------------------|---------|
| Eno2        | GGAGAAACGGAGGACACGTT       | AAGGGGATCACAGCACACTG        | Mouse   |
| Eno1        | TCACAGGCTGTTGAGCACAT       | GTGCCGTCCATCTCGATCAT        | Mouse   |
| Aldoa       | TAGTCCTTTCGCCTACCCACC      | CTCTGTCTGTTGCTGGGTGTT       | Mouse   |
| Aldoc       | GGAAAAGTGAGCTGTGCTGTG      | GCTGCCTACGGACTIONCTG        | Mouse   |
| Pgam1       | CATGGTGAGGCCAGGTAAA        | CATTCCAGAAGGGCAGTGCT        | Mouse   |
| SAMM50      | AATTCTTGAAAACAAAGATGTGGTTG | AGATTTCGCATTACCTCAATTAGG    | Human   |
| TSPO        | TCTACTCAGCCATGGGGTACG      | GTCGGGCACCAAAGAAGATGG       | Human   |
| AARS2       | TGGGGGTGAATATTTTAAGGAGGAG  | GGGTCAAAGTAGGAGATC          | Human   |
| HEBP2       | CACTATGACCAGCCAAGTG        | GTCATCTTTATTTTCATCTCTTTCTCG | Human   |
| MFN2        | CCACCTTCCTGAAGACACGT       | CTCACTGATGCCTCTCACTTTG      | Human   |
| Myf5        | CCACCTCCAAGTCTCTGAC        | CTTTTATCTGCAGCACATGCATTG    | Mouse   |
| GUSB        | CGTCCCACCTAGAATCTGCT       | TTGCTCACAAAGGTCACAGG        | Human   |
| Gusb        | TATGGAGCAGACGCAATCCC       | TTCGTCATGAAGTCGGCGAA        | Mouse   |

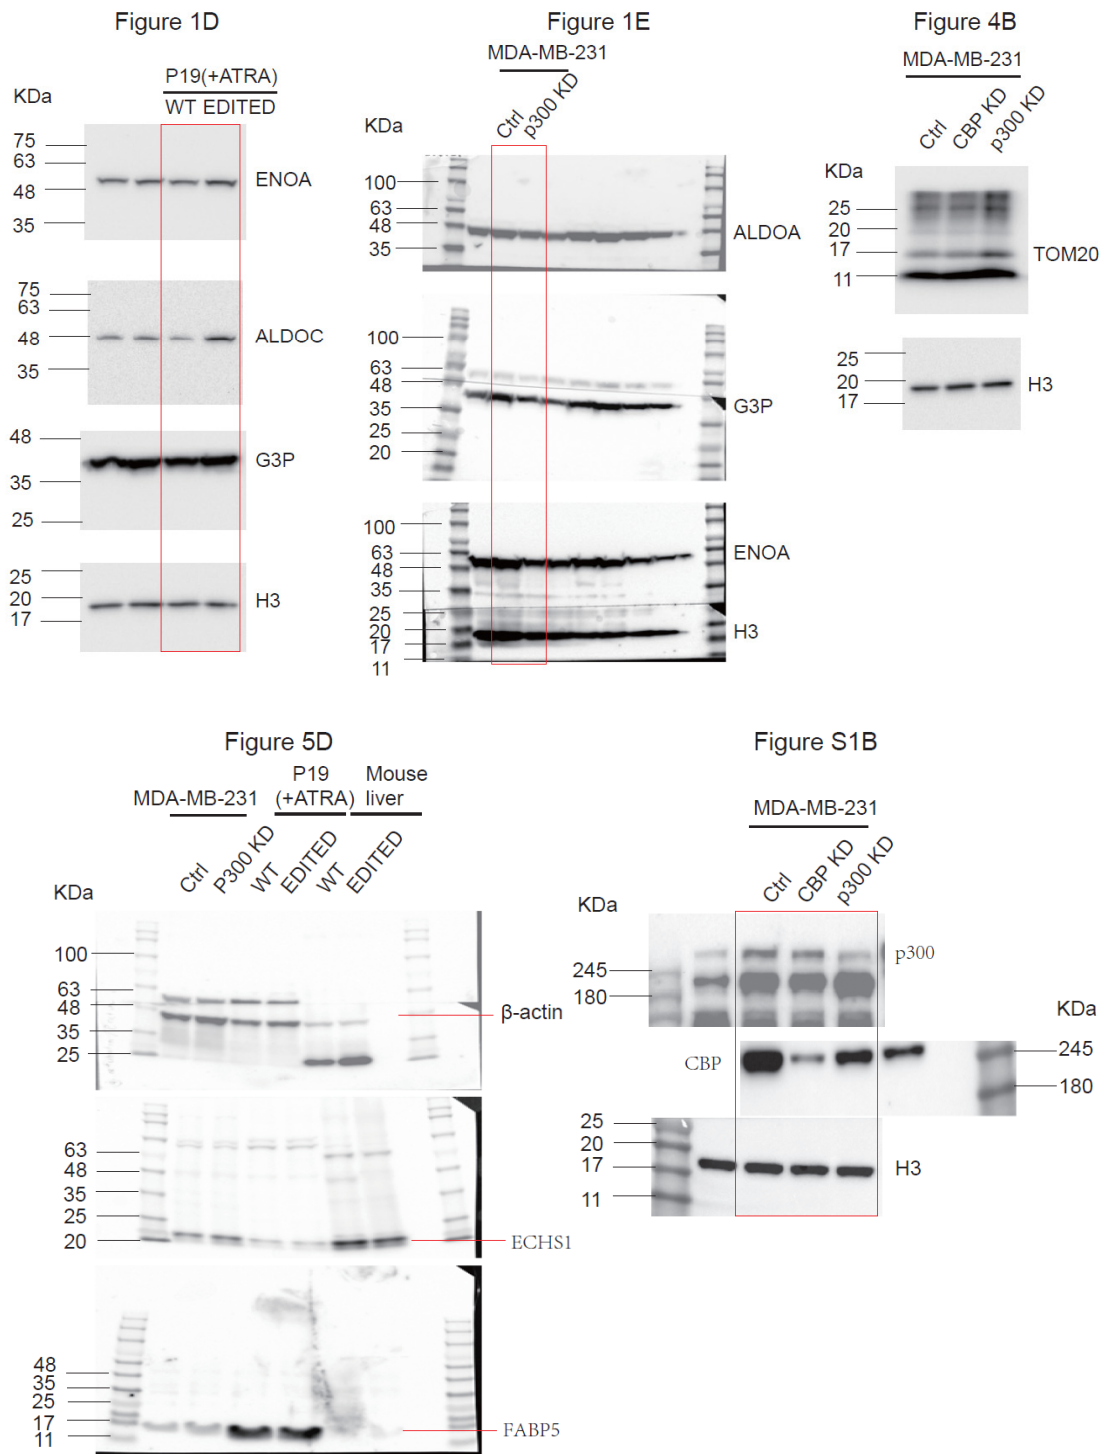

**Figure S4.** Uncropped western blot figures.
